# Supplementary material for: Virulence and Antifungal Susceptibility of Microsporum canis Strains from Animals and Humans
Source: PubMed Central journal article supplement (PMC8000290; doi:10.3390/antibiotics10030296), 2021-03-12
Supplement: antibiotics-10-00296-s001.pdf [file antibiotics-10-00296-s001.pdf]

## Article

# Virulence and Antifungal Susceptibility of *Microsporium canis* Strains from Animals and Humans

 Chioma Inyang Aneke <sup>1,2</sup>, Wafa Rhimi <sup>1</sup>, Vit Hubka <sup>3,4</sup>, Domenico Otranto <sup>1,5</sup> and Claudia Cafarchia <sup>1,\*</sup>
<sup>1</sup> Dipartimento di Medicina Veterinaria, Università degli Studi “Aldo Moro”, 70010 Bari, Italy; chioma.aneke@unn.edu.ng (C.I.A.); wafa.rhimi@uniba.it (W.R.); domenico.otranto@uniba.it (D.O.)

<sup>2</sup> Department of Veterinary Pathology and Microbiology, University of Nigeria, 410001 Nsukka, Nigeria

<sup>3</sup> Department of Botany, Faculty of Science, Charles University, 12801 Prague 2, Czech Republic; vit.hubka@gmail.com (V.H.)

<sup>4</sup> Laboratory of Fungal Genetics and Metabolism, Institute of Microbiology of the Academy of Sciences, 14220 Prague 4, Czech Republic

<sup>5</sup> Faculty of Veterinary Sciences, Bu-Ali Sina University, 6517658978 Hamedan, Iran

\* Correspondence: claudia.cafarchia@uniba.it; Tel.: +39-080-4679834; +39-3385257824

**Table S1.** Raw data and genotypes.

| Sample Code | Group (A, AL, H) | Low High Cat-          |                   | Lipase | Hemolysis | Low Thermotholerance | High Thermotholerance | ITS Genotype |
|-------------|------------------|------------------------|-------------------|--------|-----------|----------------------|-----------------------|--------------|
|             |                  | Phospholipase Producer | Catalase Producer |        |           |                      |                       |              |
| CD1134      | A                | Y                      |                   | Y      | Y         | Y                    |                       | G1           |
| CD1598      | AL               | Y                      |                   | Y      | Y         | Y                    |                       | G1           |
| CD1192      | A                | Y                      |                   | Y      | Y         | Y                    |                       | G1           |
| CD1193      | AL               | Y                      |                   | Y      | Y         | Y                    |                       | G1           |
| CD1209      | AL               | Y                      |                   | Y      | Y         |                      | Y                     | G1           |
| CD1306      | AL               | Y                      |                   | Y      | Y         | Y                    |                       | G1           |
| CD387       | AL               | Y                      |                   | Y      | Y         | Y                    |                       | G1           |
| CD409       | A                | N                      |                   | Y      | Y         | Y                    |                       | G1           |
| CD412       | AL               | Y                      |                   | Y      | Y         | Y                    |                       | G1           |
| CD430       | AL               | Y                      |                   | Y      | Y         | Y                    |                       | G1           |
| CD760       | A                | Y                      |                   | Y      | Y         |                      | Y                     | G1           |
| CD1307      | AL               | Y                      |                   | Y      | Y         |                      | Y                     | G2           |
| CD1308      | A                | Y                      |                   | Y      | Y         | Y                    |                       | G2           |
| CD1289      | AL               | Y                      |                   | Y      | Y         | Y                    |                       | G2           |
| CD1131      | AL               | Y                      |                   | Y      | Y         |                      | Y                     | G1           |
| CD1132      | AL               | Y                      |                   | Y      | Y         | Y                    |                       | G1           |
| CD1135      | AL               | Y                      | Y                 | Y      | Y         | Y                    |                       | G1           |
| CD1143      | H                | Y                      |                   | Y      | Y         | Y                    |                       | G1           |
| CD1145      | A                | Y                      |                   | Y      | Y         | N                    | Y                     | G1           |
| CD1146      | AL               | Y                      |                   | Y      | Y         | Y                    | Y                     | G1           |
| CD1148      | AL               | Y                      |                   | Y      | Y         | Y                    | Y                     | G1           |
| CD1149      | AL               | Y                      |                   | Y      | Y         | Y                    | Y                     | G1           |
| CD1150      | H                | Y                      |                   | Y      | Y         | Y                    |                       | G1           |
| CD1151      | AL               | N                      | Y                 | Y      | Y         | Y                    | Y                     | G1           |
| CD1152      | H                | Y                      |                   | Y      | Y         | Y                    |                       | G1           |
| CD1153      | AL               | N                      |                   | Y      | Y         | Y                    |                       | G1           |
| CD1190      | A                | Y                      | Y                 | Y      | N         | Y                    |                       | G1           |
| CD1191      | AL               | Y                      |                   | Y      | Y         | Y                    | Y                     | G1           |
| CD1194      | AL               | Y                      |                   | Y      | Y         | Y                    |                       | G1           |
| CD1195      | AL               | Y                      |                   | Y      | Y         | Y                    | Y                     | G1           |
| CD1196      | H                | Y                      |                   | Y      | Y         | Y                    |                       | G1           |
| CD1211      | AL               | Y                      |                   | Y      | Y         | Y                    | Y                     | G1           |
| CD1229      | AL               | N                      | Y                 | Y      | Y         | Y                    |                       | G1           |
| CD1230      | AL               | Y                      |                   | Y      | Y         | Y                    |                       | G1           |
| CD1231      | A                | Y                      |                   | Y      | Y         | Y                    | Y                     | G1           |
| CD1232      | AL               | Y                      | Y                 | Y      | Y         | Y                    |                       | G1           |
| CD1233      | AL               | Y                      |                   | Y      | Y         | Y                    | Y                     | G1           |
| CD1235      | AL               | Y                      |                   | Y      | Y         | Y                    | Y                     | G1           |

|        |    |   |   |   |   |   |   |   |    |
|--------|----|---|---|---|---|---|---|---|----|
| CD1242 | AL | Y |   | Y | Y | Y |   | Y | G1 |
| CD1279 | AL | Y |   | Y | Y | Y | Y |   | G1 |
| CD1320 | AL | Y | Y |   | Y | Y | Y |   | G1 |
| CD1565 | AL | Y |   | Y | Y | Y | Y |   | G1 |
| CD1567 | AL | Y |   | Y | Y | Y | Y |   | G1 |
| CD1595 | A  | Y |   | Y | Y | Y | Y |   | G1 |
| CD1600 | AL | Y |   | Y | Y | Y |   | Y | G1 |
| CD1601 | AL | Y |   | Y | Y | Y | Y |   | G1 |
| CD1602 | AL | Y |   | Y | Y | Y |   | Y | G1 |
| CD367  | AL | Y |   | Y | Y | Y | Y |   | G1 |
| CD382  | AL | Y |   | Y | Y | Y |   | Y | G1 |
| CD383  | A  | Y |   | Y | Y | Y | Y |   | G1 |
| CD384  | H  | Y |   | Y | Y | Y | Y |   | G1 |
| CD396  | H  | Y |   | Y | Y | Y |   | Y | G1 |
| CD415  | A  | Y |   | Y | Y | Y |   | Y | G1 |
| CD416  | AL | Y |   | Y | Y | Y |   | Y | G1 |
| CD441  | AL | Y | Y |   | Y | Y | Y |   | G1 |
| CD448  | A  | Y | Y |   | Y | Y |   | Y | G1 |
| CD761  | AL | N |   | Y | Y | Y |   | Y | G1 |
| CD975  | AL | Y |   | Y | Y | Y | Y |   | G1 |
| CD976  | AL | Y |   | Y | Y | Y | Y |   | G1 |
| CD978  | A  | N |   | Y | Y | N |   | Y | G1 |
| CD979  | AL | Y |   | Y | Y | Y |   | Y | G1 |
| CD980  | AL | N |   | Y | Y | Y | Y |   | G1 |

Key: A = Animal without lesion; AL = Animal with lesion, H = Human; Y = Yes; N = No.

**Figure S1.** Virulence factors. (a) Phospholipase activity on egg-yolk medium—a clear halo zone of clearance around the colony indicated phospholipase production. (b) Lipase activity on 1% tween 80 medium—a clear halo zone of clearance around the colony indicated lipase production (c) Catalase activity on PDA medium—column of bubbles indicated catalase production. (d) Hemolytic activity on Columbia blood agar—a transparent zone of clearance around the colony indicated hemolysis. (e) Thermotolerance determination on PDA medium.

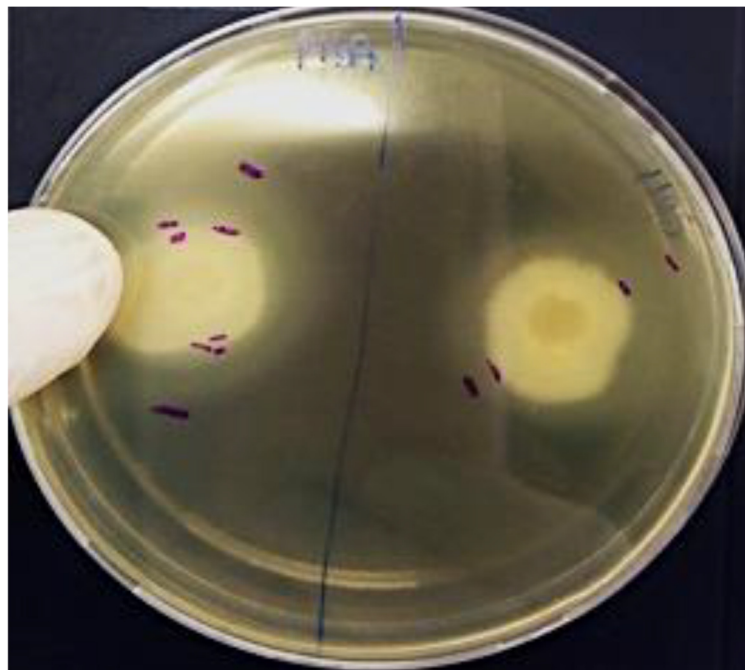

(a)

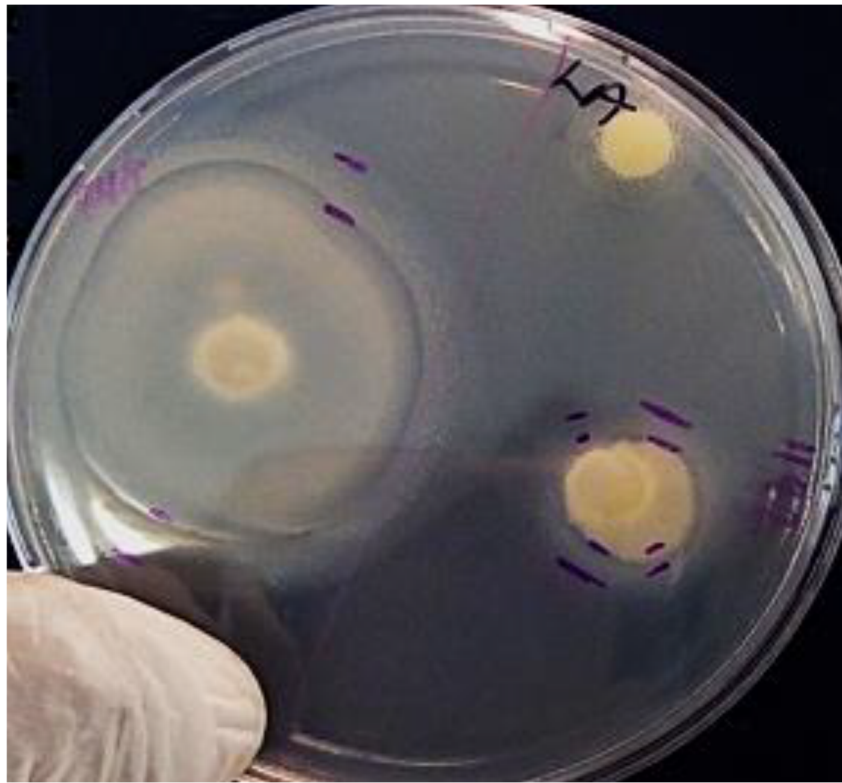

(b)

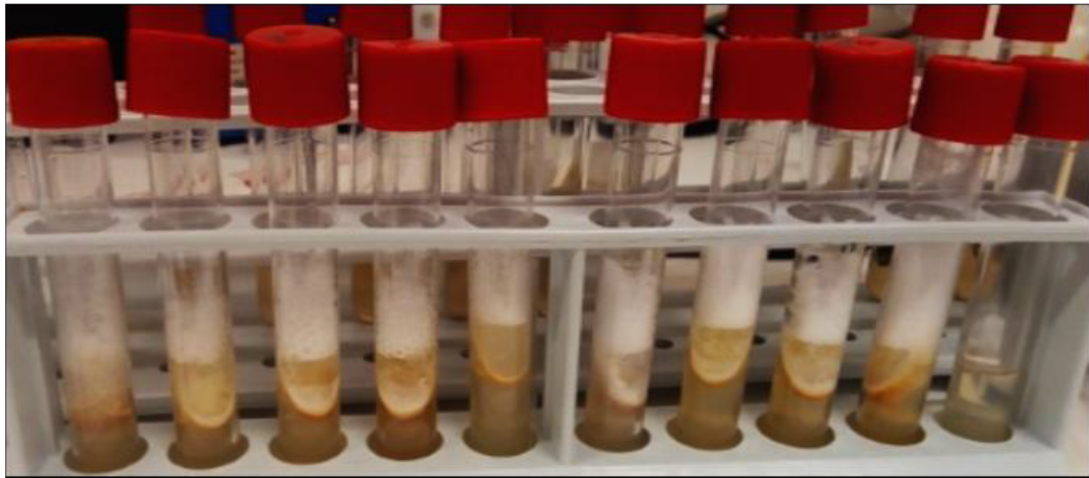

(c)

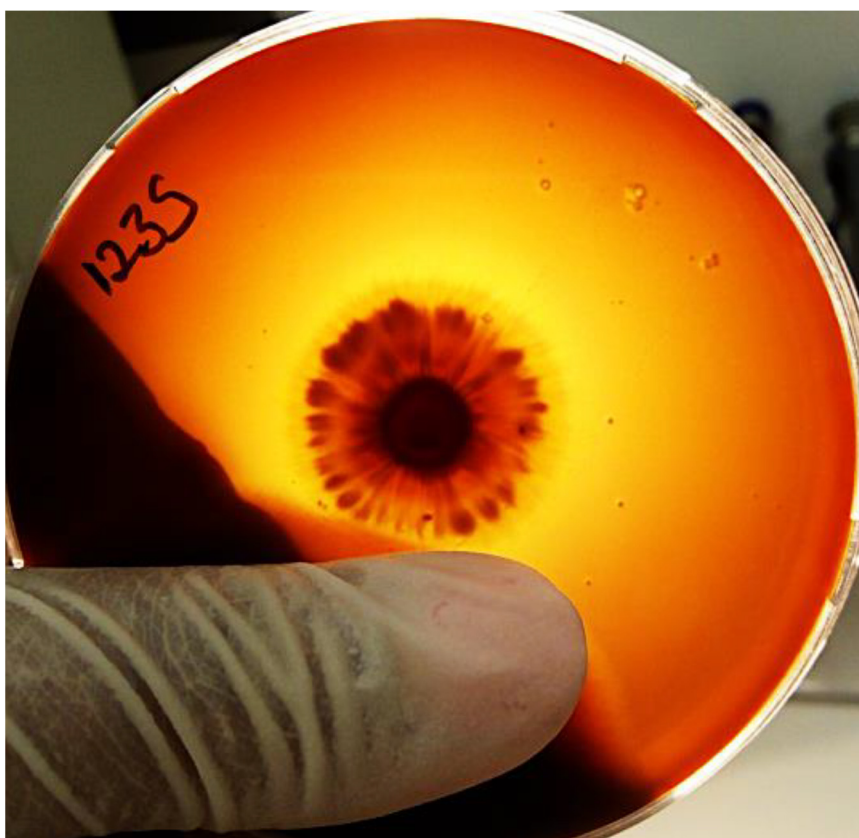

(d)

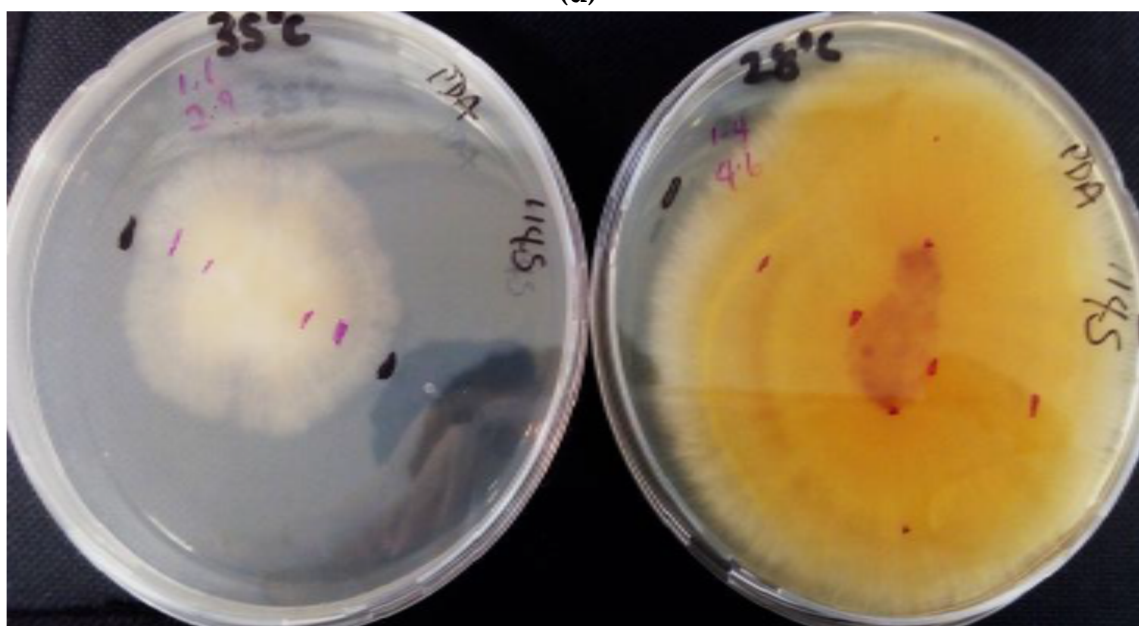

(e)
